# Supplementary material
Source: PubMed Central journal article supplement (PMC6548608)
Supplement: NIHMS1526909-supplement-1.pdf [file NIHMS1526909-supplement-1.pdf]

## Supplementary figure 1

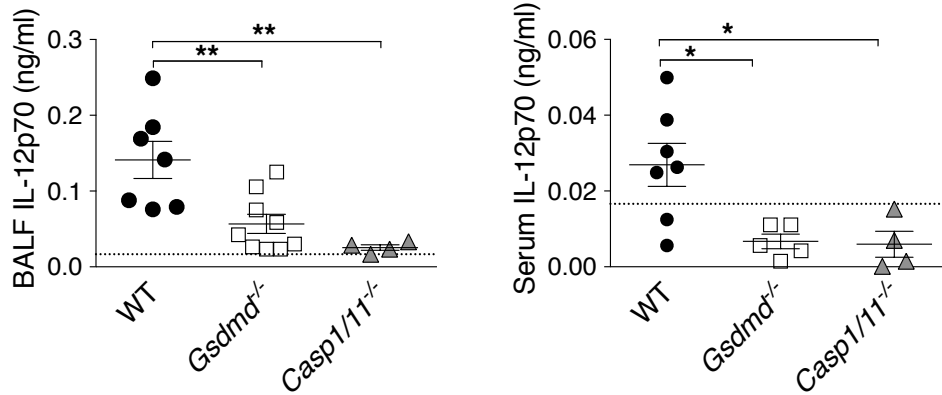

**IL-12p70 was decreased in *Gsdmd*<sup>-/-</sup> mice.** Mice infected with *B. thailandensis* ( $5 \times 10^5$  CFU) were sacrificed 48 hrs p.i. and IL-12p70 was measured in BALF and serum. Data are expressed as mean  $\pm$  S.D. \* $p$ <0.05, \*\* $p$ <0.01. One-way ANOVA.

Supplementary figure 2

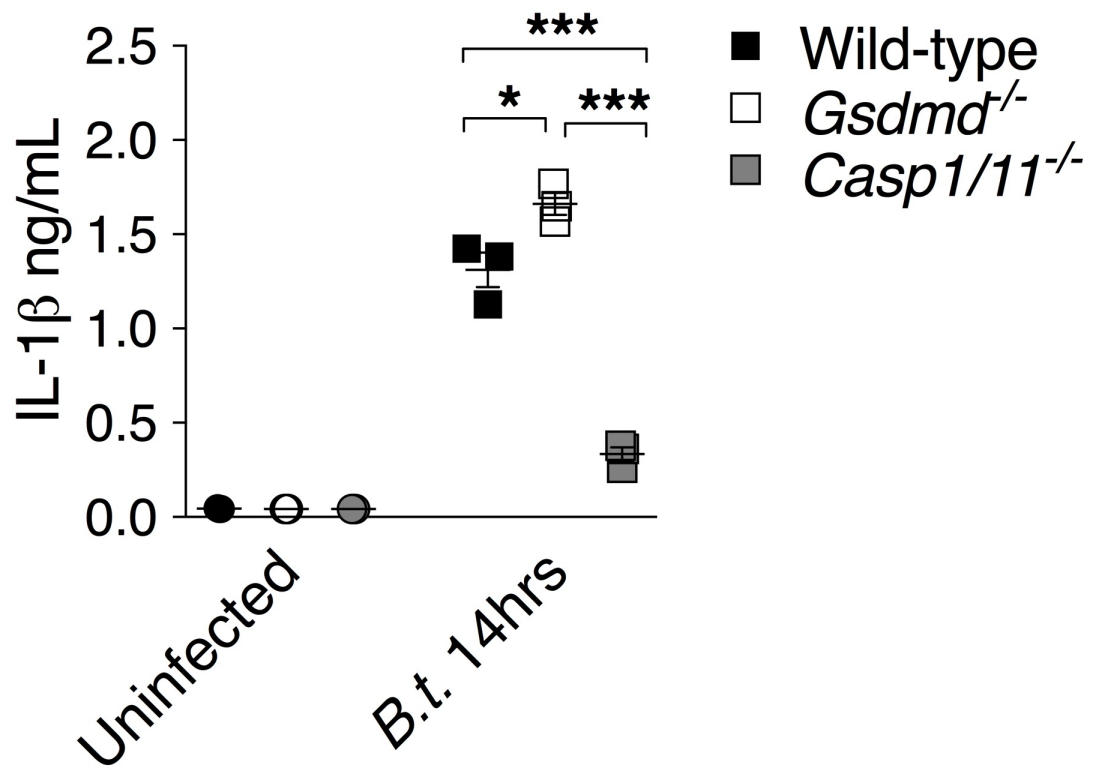

Neutrophils ( $3 \times 10^6/\text{ml}$ ) were infected with *B. thailandensis* (MOI 50). IL-1 $\beta$  secretion was measured at the indicated time point p.i. One representative experiment of two is shown. Data are expressed as mean  $\pm$  S.D. \* $p < 0.05$ , \*\*\* $p < 0.001$ . Unpaired *t*-test, One-way ANOVA.
